# Supplementary material for: The COVID-19 Animal Fostering Boom: Ephemera or Chimera?
Source: MDPI journal article supplement (doi:10.3390/ani12101325), 2022-05-23
Supplement: s1 [file s1]

Supplementary Material: Level of Foster Service, N=611

|                                          | % of Responses |
|------------------------------------------|----------------|
| One-time foster                          | 5              |
| Occasional/several times a year          | 48             |
| Seasonal/kitten season, when not working | 3              |
| Frequent/have fosters most of the time   | 44             |
